# Supplementary material
Source: publisher figshare collection journal article supplement (https://frontiersin.figshare.com/ndownloader/files/13236311)
Supplement: Supplementary file [file 13236311]

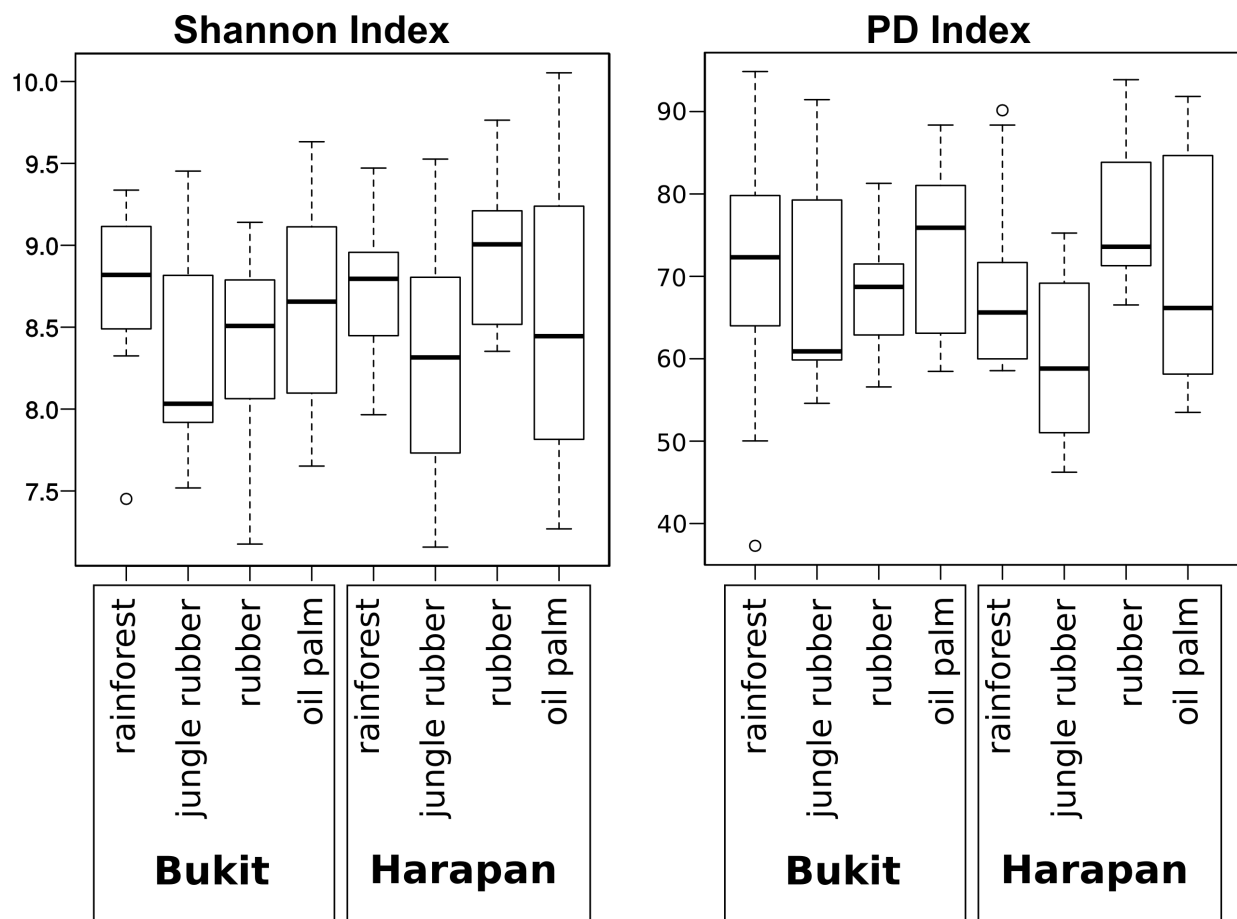

**Figure S1.** Average Shannon and PD diversity indices. Values were summarized from all subplot values at land use level in the corresponding landscape.
